# Supplementary material
Source: publisher figshare collection journal article supplement (https://wiley.figshare.com/articles/dataset/_/3564345)
Supplement: Supplementary file 1 [file 1]

variables.pdf : Data used in ordinal regression for *Ceriodaphnia* epibiont burden (example corresponding to top panel in Table 2 of the manuscript). The data file database.csv contains 1638 observations of 10 variables:

y: epibiont burden class (coded 1-5)

encId: unique identifier for individual enclosures (coded 1-12)

ccLen: basibiont body length, loge-transformed and centred

wk2: indicator, assigned values -1 for week 1, 1 for week 2, and 0 for week 3

wk3: indicator, assigned values -1 for week 1, 0 for week 2, and 1 for week 3

depth: indicator, assigned values -1 for shallow enclosures and 1 for deep enclosures

fish: indicator, assigned values -1 for treatments without fish and 1 for treatments with fish

depth fish: depth  $\times$  fish interaction term

wk2 fish: week 2  $\times$  fish interaction term

wk3 fish: week 3  $\times$  fish interaction term
